# Supplementary material for: Cross-continental soil prokaryotic phenotypic traits driven by precipitation regime and land cover
Source: Research Square preprint supplement (doi:10.21203/rs.3.rs-5145577/v1), 2025-10-31
Supplement: Supplementary file 1 [file 48512731a518f4c02ff5c18c.docx]

# Supplementary figures and tables

## Figures


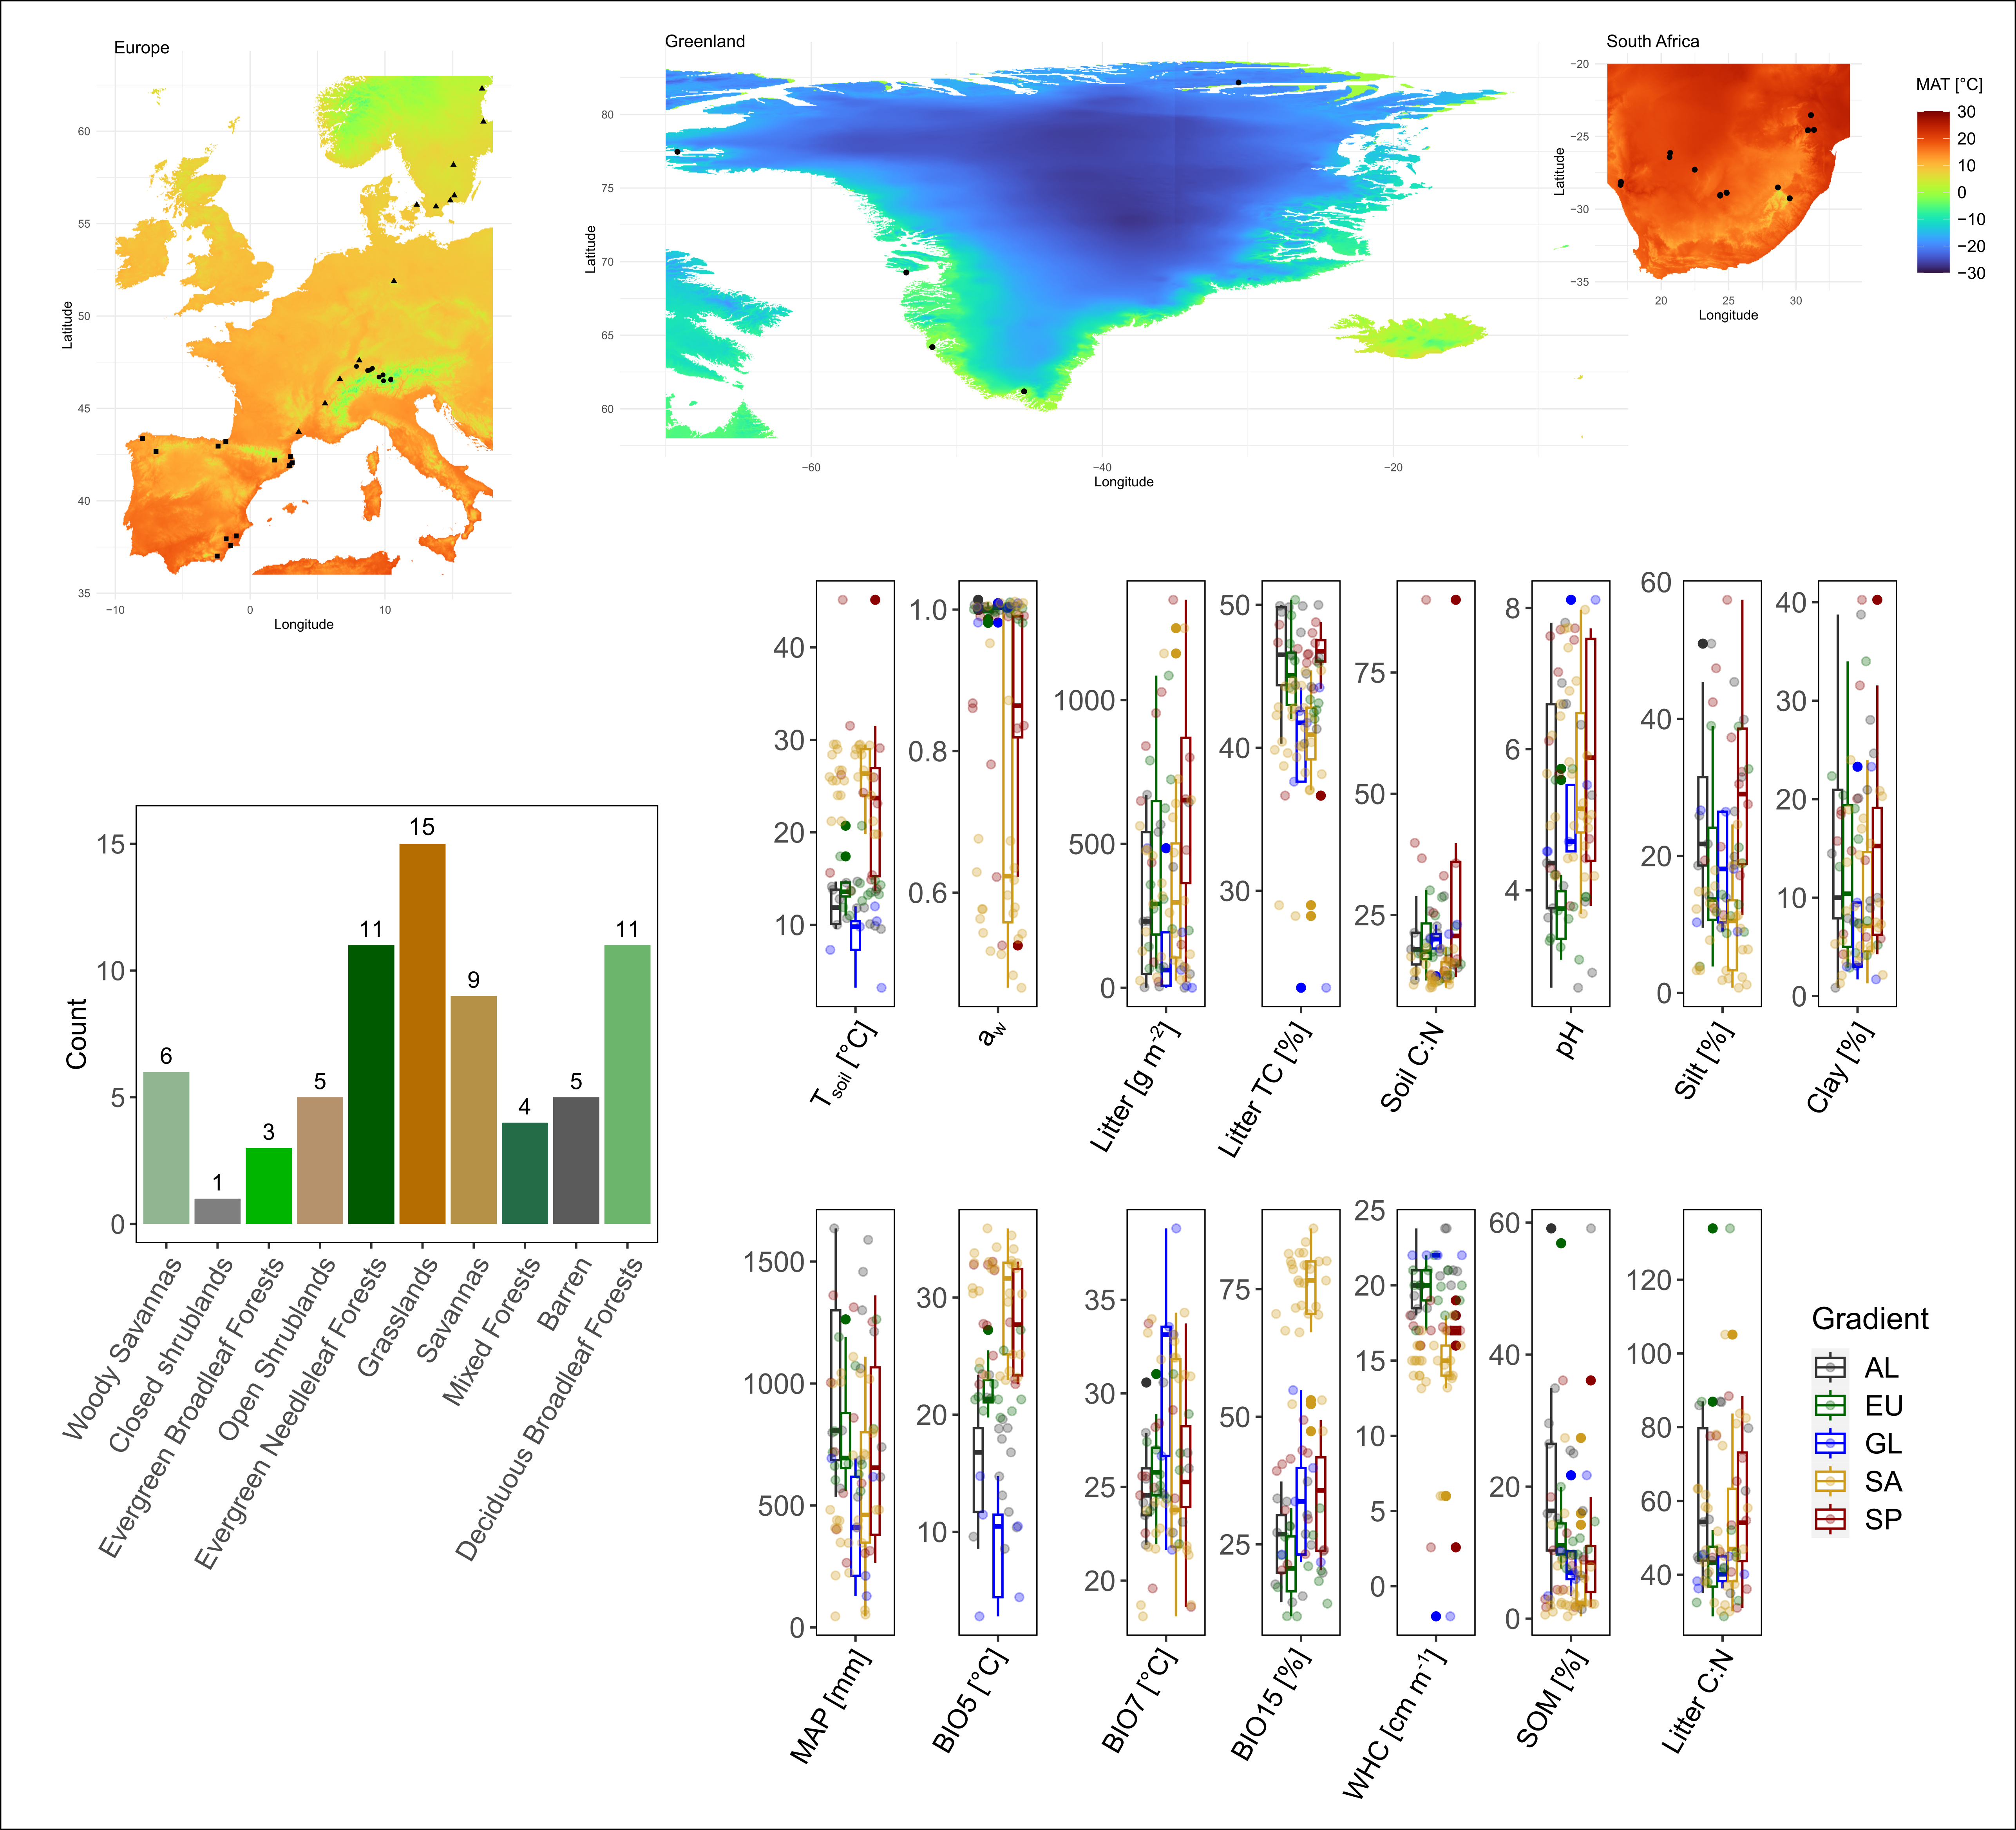
 **Figure S1** Climatic, vegetation and soil properties of the sites. Numbers on top of bars indicate sites per land cover class. The central mark of the boxplots indicates the median, upper and lower limits of boxes indicate the 25th and the 75th percentile. AL = alpine, EU = Europe, GL = Greenland, SA = South Africa, SP = Spain, aw = water activity, BIO5 = maximum temperature warmest month, BIO15 = precipitation seasonality, LC = land cover, MAP = mean annual precipitation, MAT = mean annual temperature, SOM = soil organic matter, TC = total carbon, TOC = total organic carbon, Tsoil = in situ soil temperature at the time of sampling, WHC = water holding capacity.


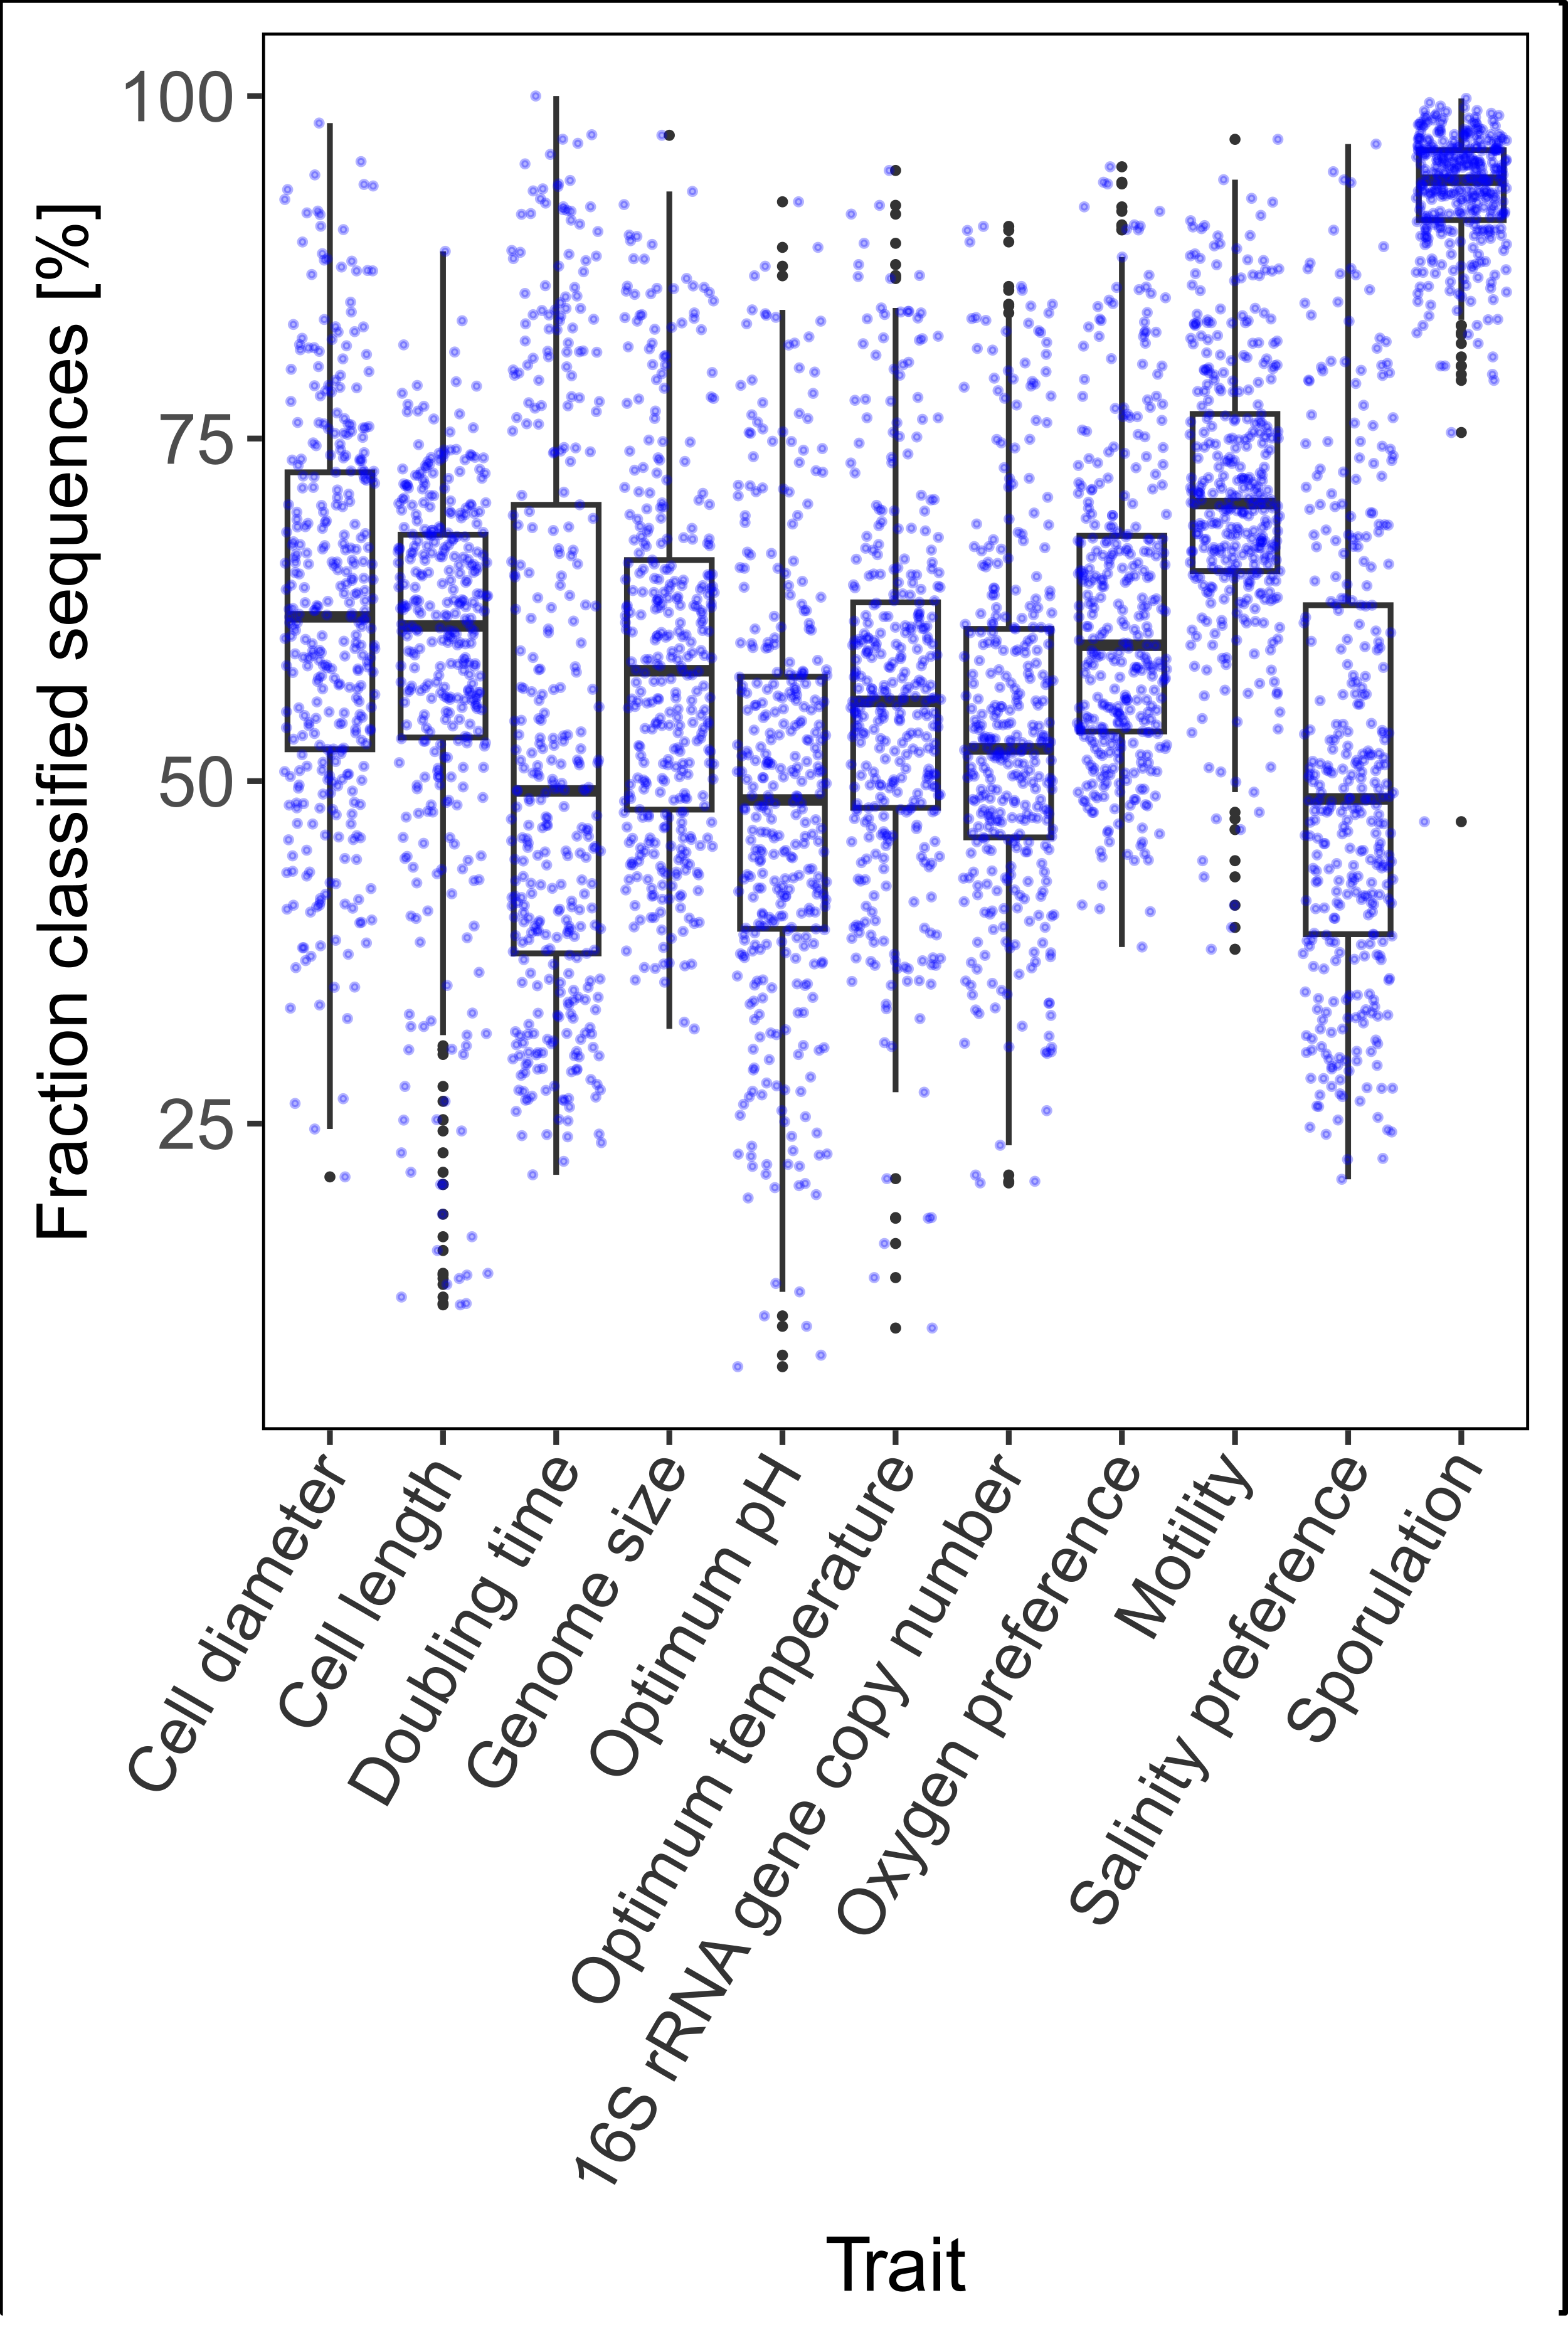


**Figure S2** Fraction of classified sequences for each trait. The central mark indicates the median, upper and lower limits of boxes indicate the 25th and the 75th percentile. Blue points represent samples, 70 sites with 5 replicates (n = 349).


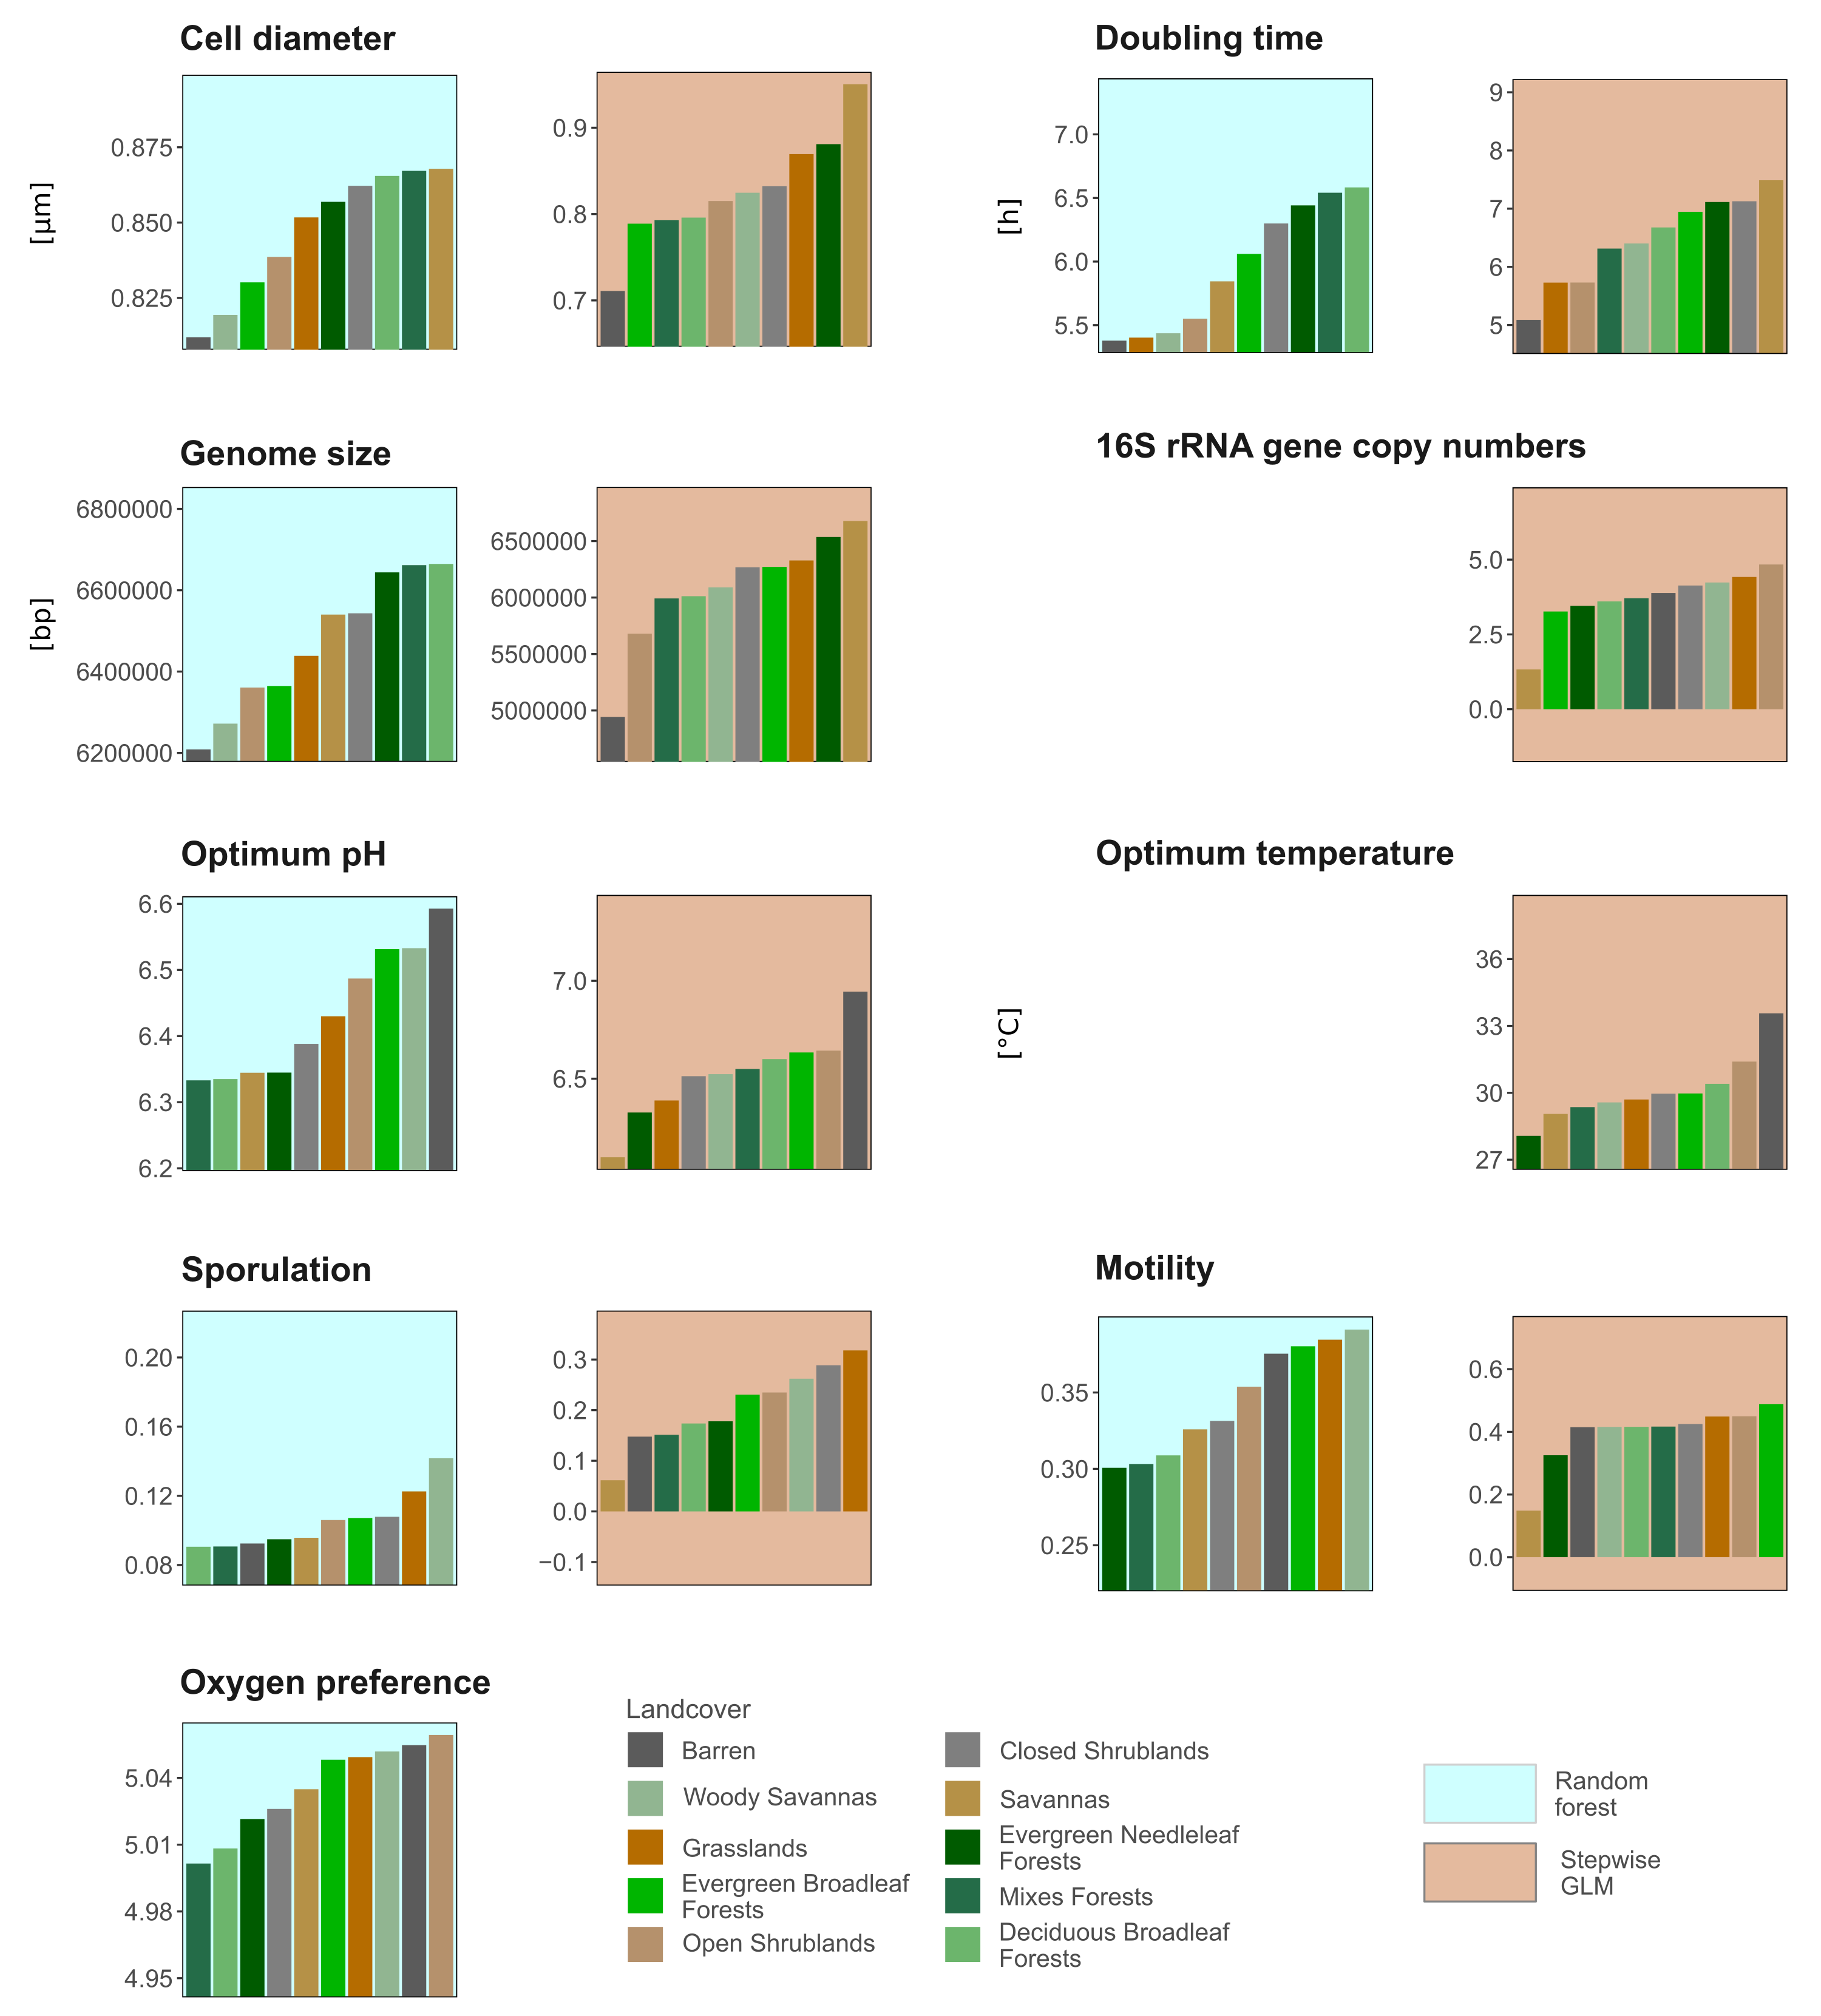
**Figure S3** Response plots for CWMs as a function of land cover class based on RFs and stepwise GLM. Only traits and models where land cover was among the five most important predictors are shown (see also Fig. 2).


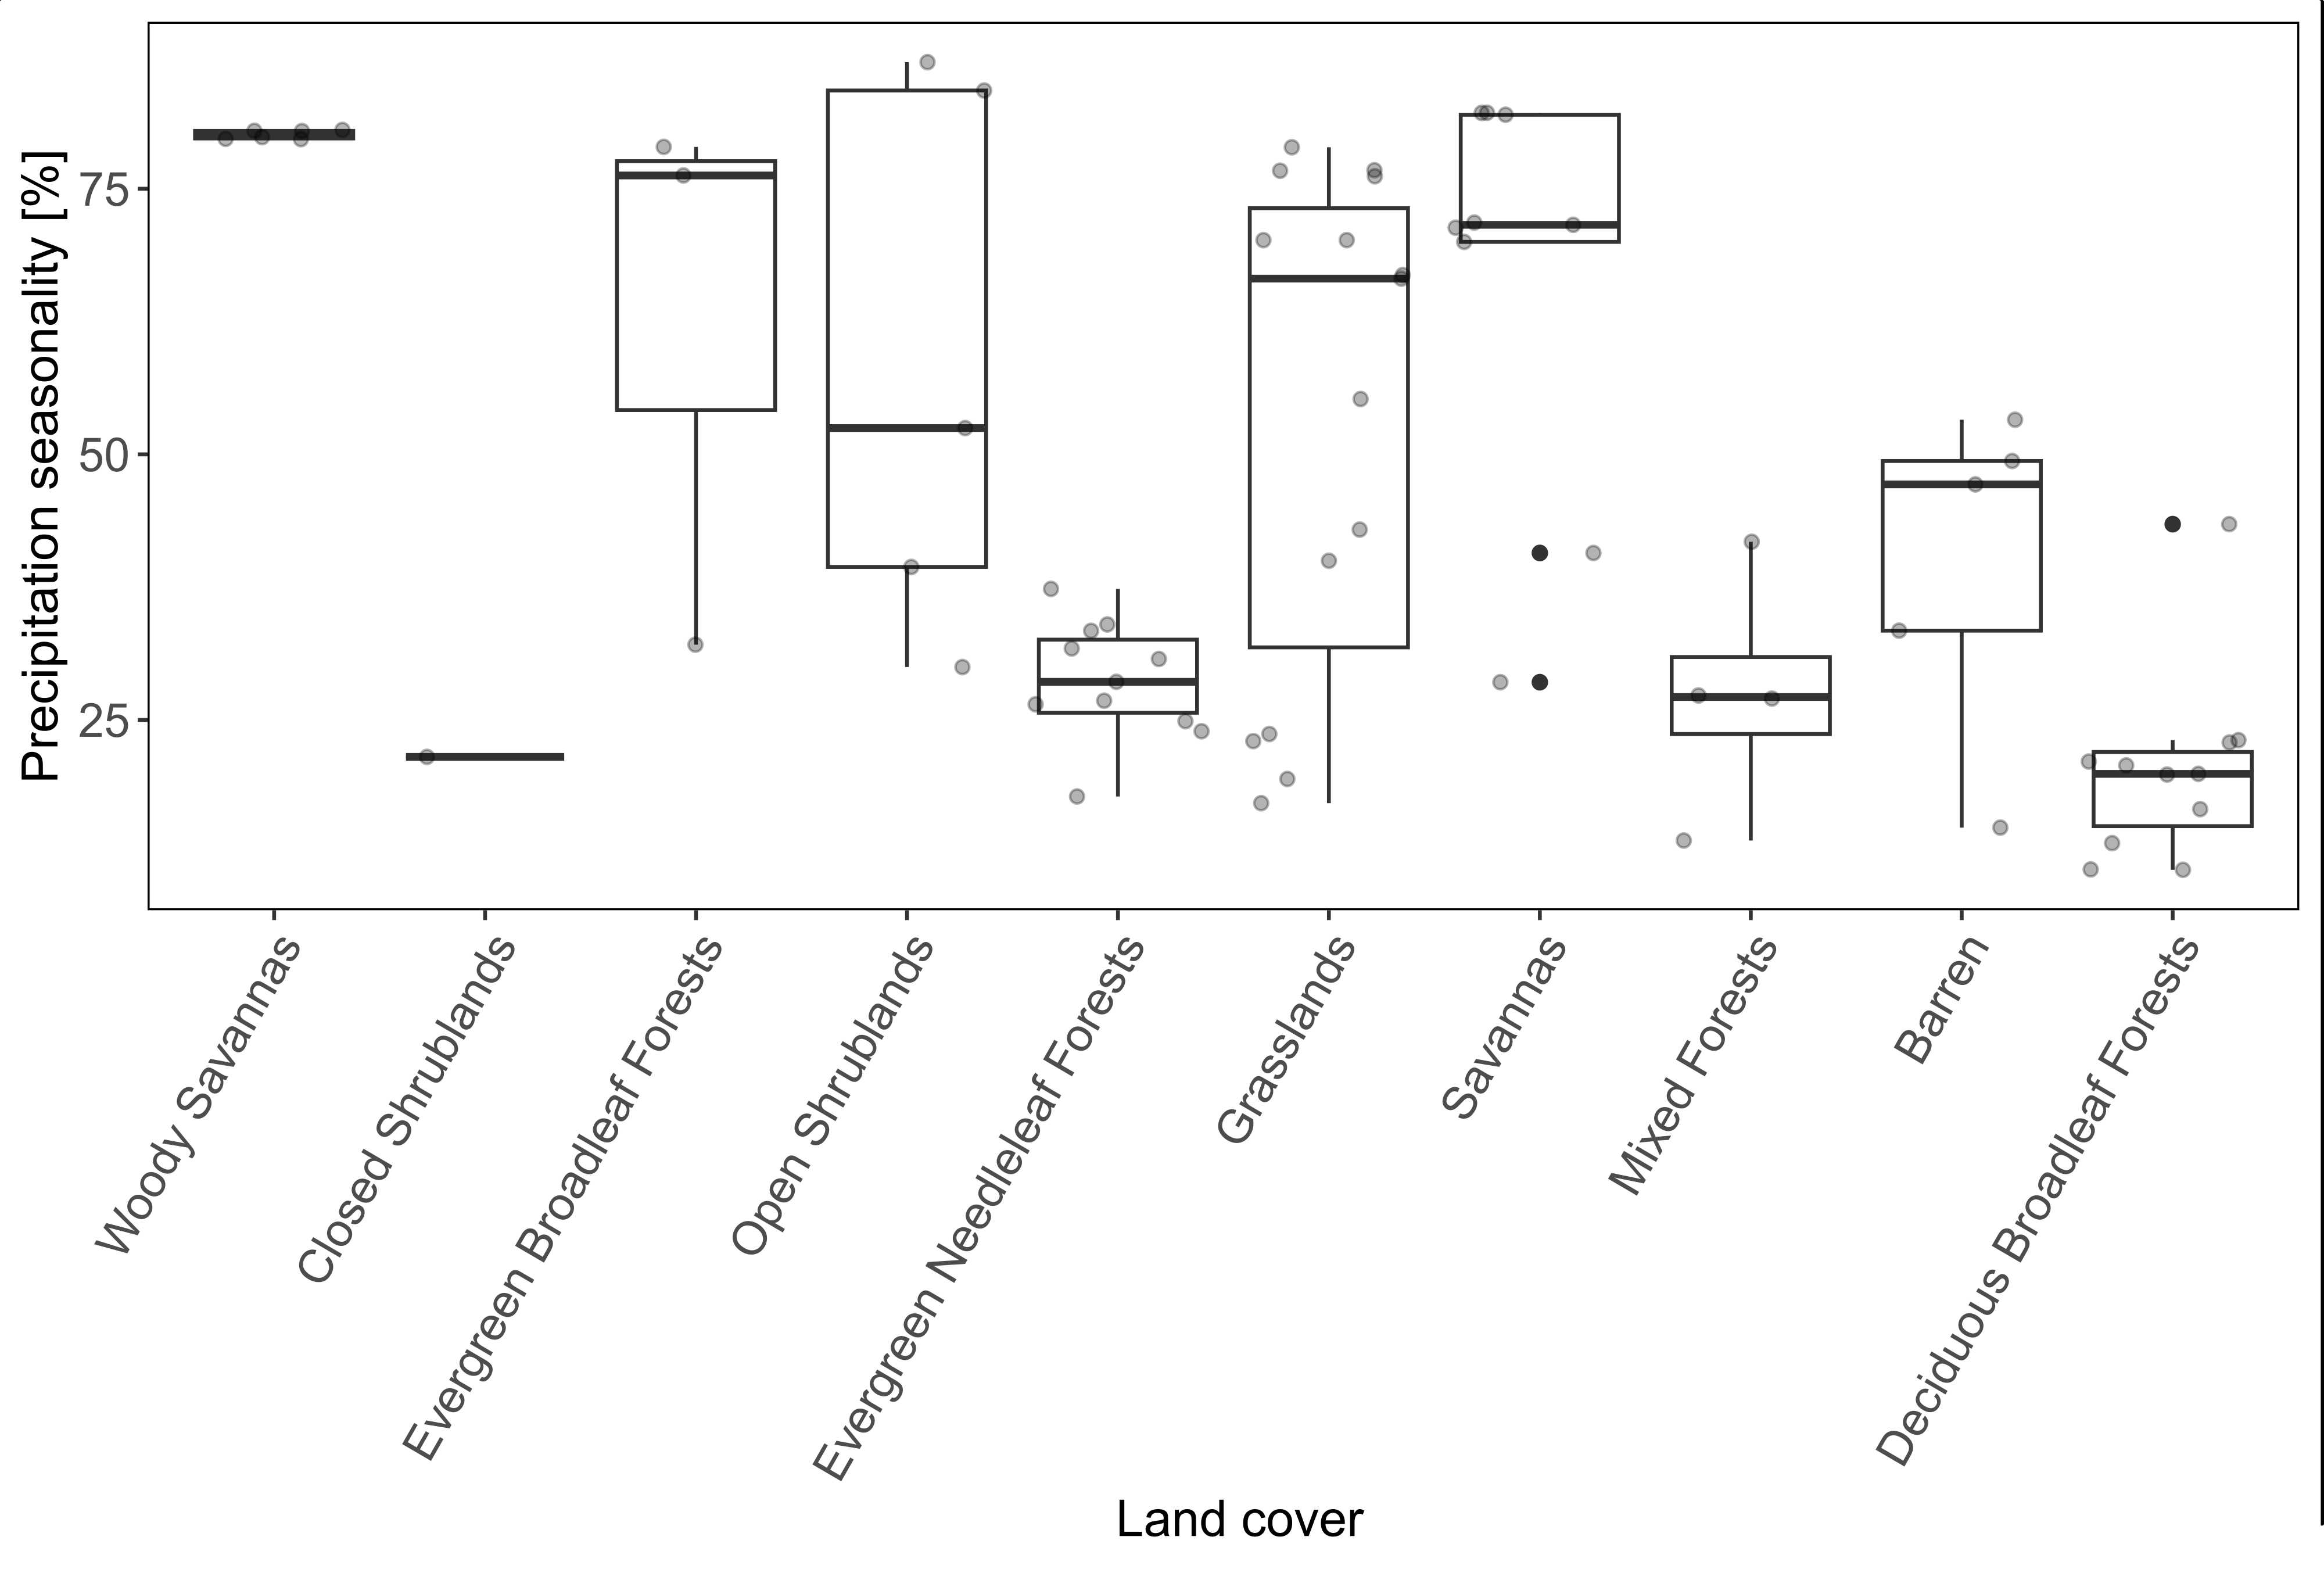
**Figure S4** Precipitation seasonality across land cover classes. The central mark indicates the median, upper and lower limits of boxes indicate the 25th and the 75th percentile. Grey points represent individual sites.


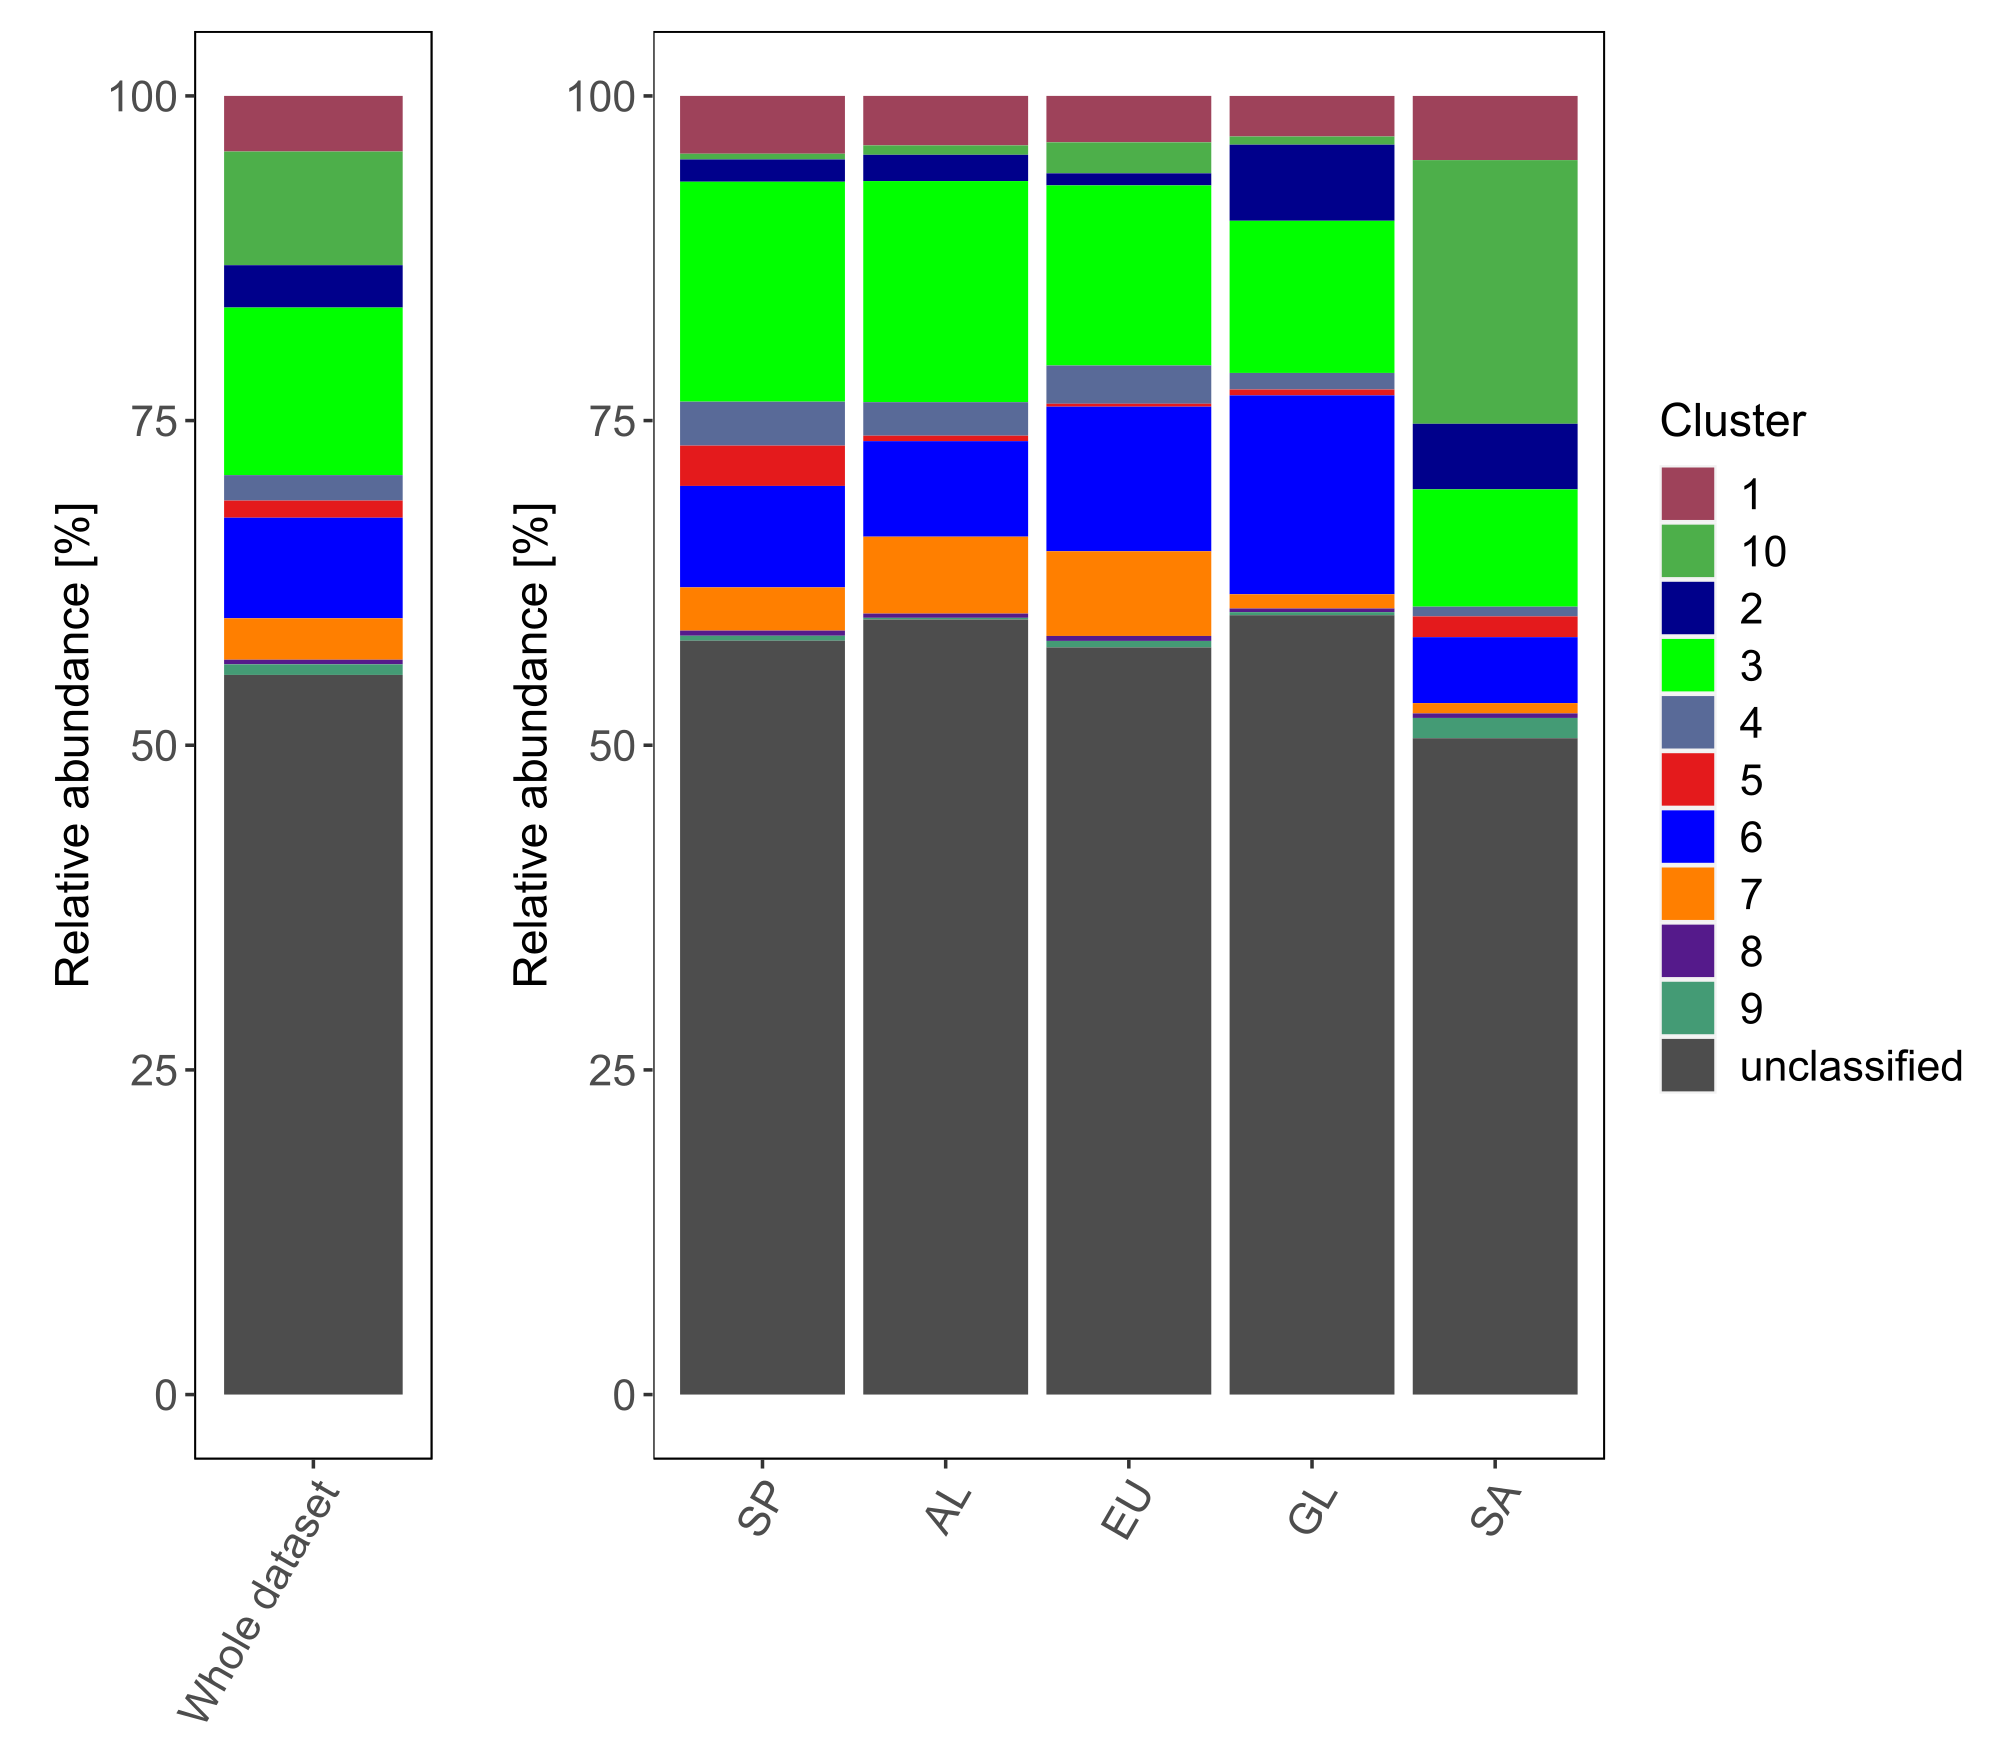
 **Figure S5** Relative abundances of trait-based clusters across the whole dataset and individual gradients

## Tables

**Table S1** Temperature and aridity gradients. Site information, climatic properties and land cover classes. MAP = mean annual precipitation, MAT = mean annual temperature, AI = aridity index

| Site Name | Gradient | Country | Latitude  [d.d.] | Longitude  [d.d.] | Altitude [m a.s.l] | MAP [mm] | MAT [°C] | BIO15 (Precipitation seasonality) [%] | AI | Predominant land cover |
| --- | --- | --- | --- | --- | --- | --- | --- | --- | --- | --- |
| Artikutza | Spain | Spain | 43.1983 | -1.8054 | 344 | 1313 | 12.1 | 20 | 1.2 | Deciduous Broadleaf Forests |
| Las Herrerias | Spain | Spain | 42.66882 | -6.98307 | 610 | 1253 | 11.0 | 43 | 1.1 | Deciduous Broadleaf Forests |
| Gavarres | Spain | Spain | 41.89968 | 2.91217 | 259 | 720 | 13.8 | 24 | 0.6 | Evergreen Needleleaf Forests |
| Coy | Spain | Spain | 37.94358 | -1.77985 | 925 | 402 | 13.5 | 39 | 0.2 | Open Shrublands |
| Tabernas | Spain | Spain | 37.00954 | -2.44254 | 283 | 265 | 17.0 | 49 | 0.2 | Barren |
| Vallcebre | Spain | Spain | 42.20294 | 1.82094 | 1096 | 859 | 9.2 | 21 | 0.7 | Deciduous Broadleaf Forests |
| Arantzazu | Spain | Spain | 42.96013 | -2.3783 | 803 | 1004 | 9.4 | 23 | 1.0 | Deciduous Broadleaf Forests |
| Fragas do Eume | Spain | Spain | 43.36926 | -7.98579 | 450 | 1362 | 12.2 | 42 | 1.3 | Mixed Forests |
| Santomera | Spain | Spain | 38.0986 | -1.03135 | 195 | 314 | 17.1 | 41 | 0.2 | Savannas |
| Malcamino | Spain | Spain | 37.58771 | -1.44243 | 278 | 304 | 16.9 | 43 | 0.2 | Grasslands |
| Montgrí | Spain | Spain | 42.06125 | 3.12231 | 103 | 550 | 14.7 | 32 | 0.4 | Evergreen Needleleaf Forests |
| Albera | Spain | Spain | 42.396 | 2.9823 | 154 | 591 | 14.4 | 30 | 0.4 | Open Shrublands |
| Umbrail Summit | Alpine | Switzerland | 46.55162 | 10.418467 | 2959 | 807 | -3.2 | 15 | 1.3 | Barren |
| Umbrail Meadow | Alpine | Switzerland | 46.55365 | 10.434283 | 2336 | 617 | -1.1 | 24 | 0.9 | Grasslands |
| Celerina | Alpine | Switzerland | 46.49205 | 9.8904 | 1844 | 799 | 1.3 | 37 | 1.0 | Evergreen Needleleaf Forests |
| Alpthal | Alpine | Switzerland | 47.0479 | 8.712617 | 1159 | 1636 | 6.1 | 25 | 1.9 | Evergreen Needleleaf Forests |
| Vordemwald | Alpine | Switzerland | 47.27337 | 7.886733 | 530 | 1213 | 9.0 | 14 | 1.4 | Mixed Forests |
| Umbrail Room | Alpine | Switzerland | 46.54887 | 10.424167 | 2715 | 740 | -2.5 | 17 | 1.2 | Grasslands |
| Umbrail Water | Alpine | Switzerland | 46.543 | 10.431183 | 2543 | 686 | -2.0 | 19 | 1.0 | Grasslands |
| Umbrail Treeline | Alpine | Switzerland | 46.56612 | 10.435117 | 2114 | 570 | 0.0 | 29 | 0.8 | Savannas |
| Umbrail Forest | Alpine | Switzerland | 46.5835 | 10.4404 | 2001 | 535 | 1.3 | 33 | 0.7 | Evergreen Needleleaf Forests |
| Davos | Alpine | Switzerland | 46.81552 | 9.856467 | 1613 | 1062 | 3.5 | 34 | 1.3 | Evergreen Needleleaf Forests |
| Lantsch | Alpine | Switzerland | 46.6978 | 9.564417 | 1443 | 1300 | 4.7 | 31 | 1.5 | Evergreen Needleleaf Forests |
| Sihltalhütte | Alpine | Switzerland | 47.07022 | 8.860217 | 971 | 1589 | 6.6 | 27 | 1.8 | Mixed Forests |
| Schänis | Alpine | Switzerland | 47.1648 | 9.066367 | 713 | 1458 | 8.1 | 27 | 1.6 | Mixed Forests |
| Sundsvall | Europe | Sweden | 62.301207 | 17.197130 | 94 | 718 | 3.8 | 26 | 1.1 | Evergreen Needleleaf Forests |
| Dångamålaö | Europe | Sweden | 56.52225 | 15.145862 | 163 | 668 | 6.5 | 18 | 0.9 | Evergreen Needleleaf Forests |
| Gribskov | Europe | Denmark | 56.01215 | 12.35839 | 41 | 604 | 7.7 | 23 | 0.8 | Deciduous Broadleaf Forests |
| Lausanne | Europe | Switzerland | 46.58377 | 6.659367 | 803 | 1263 | 8.2 | 11 | 1.4 | Deciduous Broadleaf Forests |
| Gävle | Europe | Sweden | 60.51314 | 17.302571 | 38 | 628 | 5.4 | 27 | 0.9 | Evergreen Needleleaf Forests |
| Boxholm | Europe | Sweden | 58.17229 | 15.079989 | 151 | 559 | 6.0 | 29 | 0.8 | Evergreen Needleleaf Forests |
| Långasjönäs | Europe | Sweden | 56.2525 | 14.849509 | 76 | 662 | 7.0 | 20 | 0.9 | Deciduous Broadleaf Forests |
| Linderöd | Europe | Sweden | 55.92609 | 13.782463 | 174 | 814 | 6.7 | 21 | 1.2 | Deciduous Broadleaf Forests |
| Kohlerholz | Europe | Germany | 51.87936 | 10.663356 | 297 | 805 | 7.8 | 13 | 1.0 | Deciduous Broadleaf Forests |
| Muhlbach | Europe | Germany | 47.59507 | 8.092183 | 418 | 1191 | 8.9 | 11 | 1.4 | Deciduous Broadleaf Forests |
| Grenoble | Europe | France | 45.26808 | 5.553806 | 598 | 1073 | 10.2 | 17 | 1.0 | Deciduous Broadleaf Forests |
| Montpellier | Europe | France | 43.731 | 3.60235 | 211 | 671 | 13.6 | 32 | 0.5 | Evergreen Broadleaf Forests |
| Brønlundhus | Greenland | Greenland | 82.17289 | -30.640871 | 45 | 212 | -18.1 | 33 | 1.0 | Barren |
| Qaanaaq | Greenland | Greenland | 77.46581 | -69.196991 | 57 | 129 | -12.3 | 55 | 0.5 | Grasslands |
| Disko | Greenland | Greenland | 69.26574 | -53.470587 | 118 | 410 | -5.9 | 40 | 1.1 | Grasslands |
| Nuuk | Greenland | Greenland | 64.19056 | -51.695473 | 52 | 618 | -1.0 | 23 | 1.3 | Grasslands |
| Narsarsuaq | Greenland | Greenland | 61.18367 | -45.370575 | 56 | 693 | 0.8 | 22 | 1.0 | Closed shrublands |
| Giants Castle, Maloti Drakensberg Park | South Africa | South Africa | -29.25911 | 29.526806 | 1870 | 1007 | 13.9 | 77 | 0.6 | Grasslands |
| Giants Castle, Maloti Drakensberg Park | South Africa | South Africa | -29.27036 | 29.520444 | 1870 | 1019 | 13.8 | 76 | 0.7 | Grasslands |
| Giants Castle, Maloti Drakensberg Park | South Africa | South Africa | -29.24872 | 29.531333 | 1870 | 1001 | 14.2 | 77 | 0.6 | Grasslands |
| Mariepskop | South Africa | South Africa | -24.58461 | 30.862306 | 1306 | 1043 | 17.2 | 79 | 0.6 | Grasslands |
| Mariepskop | South Africa | South Africa | -24.56119 | 30.893694 | 1402 | 1110 | 16.7 | 76 | 0.7 | Evergreen Broadleaf Forests |
| Mariepskop | South Africa | South Africa | -24.58472 | 30.861639 | 1212 | 1043 | 17.2 | 79 | 0.6 | Evergreen Broadleaf Forests |
| SAWLC | South Africa | South Africa | -24.53967 | 31.332306 | 502 | 707 | 21.4 | 80 | 0.4 | Woody Savannas |
| SAWLC | South Africa | South Africa | -24.54208 | 31.328667 | 489 | 706 | 21.4 | 80 | 0.4 | Woody Savannas |
| SAWLC | South Africa | South Africa | -24.55306 | 31.326861 | 514 | 713 | 21.3 | 80 | 0.4 | Woody Savannas |
| Mthimkhulu | South Africa | South Africa | -23.53314 | 31.101583 | 345 | 483 | 22.4 | 82 | 0.3 | Savannas |
| Mthimkhulu | South Africa | South Africa | -23.52492 | 31.116444 | 349 | 482 | 22.4 | 82 | 0.3 | Savannas |
| Mthimkhulu | South Africa | South Africa | -23.53231 | 31.101722 | 344 | 482 | 22.4 | 82 | 0.3 | Savannas |
| Benfontein | South Africa | South Africa | -28.89161 | 24.860444 | 1156 | 437 | 18.0 | 70 | 0.2 | Savannas |
| Benfontein | South Africa | South Africa | -28.85594 | 24.841 | 1180 | 440 | 18.1 | 70 | 0.2 | Grasslands |
| Benfontein | South Africa | South Africa | -28.85586 | 24.841139 | 1170 | 440 | 18.1 | 70 | 0.2 | Grasslands |
| Golden Gate National Park | South Africa | South Africa | -28.50433 | 28.646472 | 2006 | 797 | 12.6 | 67 | 0.5 | Grasslands |
| Golden Gate National Park | South Africa | South Africa | -28.51483 | 28.656278 | 2092 | 810 | 12.4 | 67 | 0.5 | Grasslands |
| Mokala National Park | South Africa | South Africa | -29.01372 | 24.375972 | 1064 | 410 | 18.6 | 72 | 0.2 | Savannas |
| Mokala National Park | South Africa | South Africa | -29.05086 | 24.353694 | 1121 | 406 | 18.5 | 72 | 0.2 | Savannas |
| Mokala National Park | South Africa | South Africa | -29.07953 | 24.3725 | 1148 | 407 | 18.3 | 71 | 0.2 | Savannas |
| Tswalu Kalahari Reserve | South Africa | South Africa | -27.28314 | 22.484778 | 1162 | 346 | 19.3 | 80 | 0.1 | Woody Savannas |
| Tswalu Kalahari Reserve | South Africa | South Africa | -27.28697 | 22.485722 | 1200 | 347 | 19.3 | 80 | 0.1 | Woody Savannas |
| Tswalu Kalahari Reserve | South Africa | South Africa | -27.29197 | 22.486917 | 1216 | 348 | 19.2 | 81 | 0.1 | Woody Savannas |
| Kgalagadi Transfrontier Park | South Africa | South Africa | -26.42622 | 20.619278 | 875 | 213 | 20.5 | 84 | 0.1 | Open Shrublands |
| Kgalagadi Transfrontier Park | South Africa | South Africa | -26.12164 | 20.664722 | 928 | 224 | 20.2 | 87 | 0.1 | Open Shrublands |
| Richtersveld Transfrontier Park | South Africa | South Africa | -28.12186 | 17.009028 | 287 | 45 | 20.3 | 47 | 0.0 | Barren |
| Richtersveld Transfrontier Park | South Africa | South Africa | -28.16331 | 17.020222 | 418 | 53 | 19.7 | 53 | 0.0 | Barren |
| Richtersveld Transfrontier Park | South Africa | South Africa | -28.33547 | 16.987167 | 662 | 71 | 18.8 | 52 | 0.0 | Open Shrublands |
